# Supplementary material
Source: Springer Nature journal article supplement (https://www.springermedizin.de/resource/supplementary/13601_2013_430_MOESM7_ESM.pdf/9677878)
Supplement: MOESM7 [file 9677878]

## The Hypoallergenic Formulas

The constituents vary between the different individual Extensively Hydrolysed Formulas (eHFs) available and also between the different individual Amino Acid Formulas (AAFs) available. This can sometimes influence both an infant's clinical tolerance and even their perceived apparent palatability of that formula.

The Hypoallergenic Formulas currently most commonly used in the infant age group in the UK for term infants are:

### Extensively Hydrolysed Formulas - eHFs

#### Casein-based constituents

|                           |                   |                  |          |
|---------------------------|-------------------|------------------|----------|
| <b>Nutramigen LIPIL 1</b> | Birth onwards     | Mead Johnson     | 400g tin |
| <b>Nutramigen LIPIL 2</b> | > 6 months of age | Mead Johnson     | 400g tin |
| <b>Similac Alimentum</b>  | Birth onwards     | Abbott Nutrition | 400g tin |

#### Whey-based constituents\*

|                               |                   |         |                  |
|-------------------------------|-------------------|---------|------------------|
| <b>Althéra</b>                | Birth onwards     | Vitaflo | 450g tin         |
| <b>Milupa Aptamil Pepti 1</b> | Birth onwards     | Milupa  | 400g or 900g tin |
| <b>Milupa Aptamil Pepti 2</b> | > 6 months of age | Milupa  | 400g or 900g tin |

\* Both the whey based extensively hydrolysed formulas contain lactose

---

### Amino Acid-based Formulas - AAFs

|                            |               |              |          |
|----------------------------|---------------|--------------|----------|
| <b>Neocate LCP</b>         | Birth onwards | Nutricia SHS | 400g tin |
| <b>Nutramigen AA LIPIL</b> | Birth onwards | Mead Johnson | 400g tin |

These are the formulas currently available in the UK, but the range may be different in each country or expanded.
